1 **An interventional Soylent diet increases the**  
2 ***Bacteroidetes* to *Firmicutes* ratio in human gut**  
3 **microbiome communities: a randomized controlled**  
4 **trial**

5 Ryan H. Hsu<sup>1\*</sup>, Dylan M. McCormick<sup>2</sup>, Mitchell J. Seitz Jr.<sup>3</sup>, Lauren M. Lui<sup>4</sup>, Harneet S.  
6 Rishi<sup>5,6</sup>, Adam P. Arkin<sup>4,7</sup>

7  
8 <sup>1</sup>Plant and Microbial Biology, University of California, Berkeley, California, United States  
9 of America

10  
11 <sup>2</sup>Molecular and Cell Biology, University of California, Berkeley, California, United States  
12 of America

13  
14 <sup>3</sup>Integrative Biology, University of California, Berkeley, California, United States of  
15 America

16  
17 <sup>4</sup>Environmental Genomics and Systems Biology, Lawrence Berkeley National  
18 Laboratory, Berkeley, California, United States of America

19  
20 <sup>5</sup>Biophysics Graduate Group, University of California, Berkeley, California, United States  
21 of America

22  
23 <sup>6</sup>Designated Emphasis Program in Computational and Genomic Biology, University of  
24 California, Berkeley, California, United States of America

25  
26 <sup>7</sup>Bioengineering, University of California, Berkeley, California, United States of America

27  
28  
29 \*Corresponding author

30 E-mail: [ryan.hsu@berkeley.edu](mailto:ryan.hsu@berkeley.edu) (RH)

31

## 32 **Abstract**

33 Our knowledge of the relationship between the gut microbiome and health has rapidly  
34 expanded in recent years. Diet has been shown to have causative effects on  
35 microbiome composition, which can have subsequent implications on health. Soylent  
36 2.0 is a liquid meal replacement drink that satisfies nearly 20% of all recommended  
37 daily intakes per serving. This study aims to characterize the changes in gut microbiota  
38 composition resulting from a short-term Soylent diet. Fourteen participants were  
39 separated into two groups: 5 in the regular diet group and 9 in the Soylent diet group.  
40 The regular diet group maintained a diet closely resembling self-reported regular diets.  
41 The Soylent diet group underwent three dietary phases: A) a regular diet for 2 days, B)  
42 a Soylent-only diet (five servings of Soylent daily and water as needed) for 4 days, and  
43 C) a regular diet for 4 days. Daily logs self-reporting diet, Bristol stool ratings, and any  
44 abdominal discomfort were electronically submitted. Eight fecal samples per participant  
45 were collected using fecal sampling kits, which were subsequently sent to uBiome, Inc.  
46 for sample processing and V4 16S rDNA sequencing. Reads were clustered into  
47 operational taxonomic units (OTUs) and taxonomically identified against the  
48 GreenGenes 16S database. We find that an individual's alpha-diversity is not  
49 significantly altered during a Soylent-only diet. In addition, principal coordinate analysis  
50 using the unweighted UniFrac distance metric shows samples cluster strongly by  
51 individual and not by dietary phase. Among Soylent dieters, we find a significant  
52 increase in the ratio of *Bacteroidetes* to *Firmicutes* abundance, which is associated with

53 several positive health outcomes, including reduced risks of obesity and intestinal  
54 inflammation.

## 55 **Introduction**

56 The gut microbiota plays a key role in mediating human health, including aspects of  
57 infection, inflammation, and obesity [1–3]. While many factors that influence the gut  
58 microbiome have been identified, diet has been consistently shown to be a major  
59 contributor [4,5]. This has led to a growing consumer awareness of dietary choices that  
60 function as prebiotics and probiotics [6].

61 Meal replacement drinks are an emerging alternative to traditionally prepared meals that  
62 are designed to conveniently supply full servings of dietary nutrients. Among these  
63 products, Soylent 2.0 in particular has gained recent popularity. Soylent 2.0's  
64 formulation is engineered to fulfill nearly all recommended daily intakes of total fat,  
65 sodium, potassium, carbohydrates, proteins, vitamins, and minerals, without excess  
66 sugars or cholesterol [7]. Given the critical role of intestinal flora in various human  
67 health outcomes, we are interested in studying how meal replacements like Soylent  
68 affect gut microbiome composition.

69 To assess the compositional changes to the gut microbiome resulting from a Soylent-  
70 only diet, we performed a parallel randomized controlled trial consisting of a control  
71 group that adhered to self-reported regular diets and a treatment group that received a  
72 Soylent 2.0 dietary intervention. Fecal samples were regularly collected and sequenced  
73 to quantify microbial populations at defined timepoints throughout the study.

74 This study was conceived, designed, and coordinated by a team of undergraduates at  
75 UC Berkeley and funded via Experiment, a website that hosts online crowdfunding  
76 campaigns for scientific research. The funders did not participate in study conception,  
77 experimental design, or data analysis.

## 78 **Material and Methods**

### 79 **Institutional clinical trial registration**

80 The study was granted institutional review board approval from the Committee for  
81 Protection of Human Subjects at the University of California, Berkeley (CPHS #2016-04-  
82 8727, October 14, 2016). The trial was publicly submitted to the clinicaltrials.gov registry  
83 (ID #NCT03203044, June 27, 2017) following completion. The trial was not publicly  
84 registered prior to subject enrollment due to a miscategorization of the study as a non-  
85 clinical trial. All related and future trials will be prospectively submitted to a public  
86 registry.

### 87 **Subject enrollment and selection**

88 Written informed consent to participate in the study was solicited through Mycrobites, an  
89 undergraduate student organization at the University of California, Berkeley. Consenting  
90 individuals were administered a questionnaire surveying for age, biological sex,  
91 ethnicity, student status, pregnancy status, food allergies or sensitivities, health  
92 complications, dietary supplements or medications, prior Soylent consumption, and

93 dietary and lifestyle descriptions. Participants were selected at random from eligible  
94 individuals who did not report non-student status, pregnancy, serious food allergies or  
95 sensitivities, chronic disease, current use of medications, or prior Soylent consumption  
96 (Fig 1). Participation in the study was entirely voluntary, and subjects did not receive  
97 any compensation.

98 **Fig 1. CONSORT flow diagram of the study.**

## 99 **Study procedure**

100 The study design is a parallel randomized controlled trial. Participants were randomly  
101 assigned to the control or treatment group, also referred to as the regular diet and  
102 Soylent diet group. Individuals in the control group maintained their regular diets  
103 throughout the study, allowing characterization of daily fluctuations in microbiome  
104 composition, while participants in the treatment group received 20 bottles of Soylent 2.0  
105 to consume during phase B of the study. Soylent 2.0 is a liquid formulation consisting of  
106 primarily soy protein, algal oil, and isomaltulose, as well as smaller amounts of other  
107 ingredients such as essential vitamins and minerals (S1 Fig).

108 The study was organized into three phases spanning a period of ten days (Fig 2).  
109 During phase A, all participants maintained their regular diets for two days. In phase B,  
110 the Soylent diet group switched to a Soylent-only diet consisting of a recommended 5  
111 servings of Soylent daily *ad libitum* (and water as needed) for four days, while the  
112 regular diet group retained a normal diet. During Phase C, all participants returned to  
113 their regular diets for four days. Prior to the initiation of the study, eight uBiome stool

114 sampling kits were distributed to each participant for use on eight specific days.  
115 Participants who missed a sampling day were instructed to sample on the following day  
116 if possible. Additionally, participants submitted daily electronic forms reporting their diet,  
117 time of bowel movements, Bristol stool ratings, and any symptoms or discomfort (S1  
118 File). The primary outcome measure is microbiome composition.

119 **Fig 2. Study design.** The study design consists of a time-course over 10 days. 9 and 5  
120 participants were randomized to the Soylent and regular diet groups, respectively. The  
121 Soylent diet group maintained a regular diet during phase A to quantify baseline  
122 microbiome composition, switched to a Soylent-only diet during phase B, and returned  
123 to a regular diet during phase C. The regular diet group, which serves a control,  
124 maintained a regular diet throughout the study period to quantify day-to-day variations in  
125 microbiome composition. Fecal samples were collected on the 8 days specified using  
126 the uBiome Gut Kit and submitted for 16S sequencing.

## 127 **Sample collection and 16S rDNA sequencing**

128 Commercially available uBiome Gut Kits were used to sample, store, and transport fecal  
129 samples to uBiome, Inc [8]. Fecal samples were swabbed from used toilet paper with  
130 the included sterile swabs and immediately resuspended into tubes containing lysis and  
131 stabilization buffer. The tubes were sealed and stored at ambient temperature. Once all  
132 sampling was completed, samples were delivered to uBiome Inc. and run through their  
133 standard stool 16S sample processing and sequencing pipeline as follows: Genomic  
134 DNA was extracted in a class 1000 clean room using a column-based approach by a

135 liquid-handling robot. The V4 region of the 16S rRNA gene was amplified using  
136 universal primers (515F:GTGCCAGCMGCCGCGGTAA and 806R:105  
137 GGACTACHVGGGTWTCTAAT) and barcoded to allow for multiplexed sequencing.  
138 Column-based cleanup, size selection, and qPCR quantification were utilized to prepare  
139 libraries. 2 x 150 bp paired-end sequencing was performed on an Illumina NextSeq 500.  
140 Sequencing reads were demultiplexed using the Illumina BCL2FASTQ algorithm and  
141 electronically sent to the researchers.

## 142 **Read processing and OTU analysis**

143 Custom scripts were used to merge sequencing data across sequencing lanes and  
144 relabel samples [9]. USEARCH 9.2 was utilized to stitch and quality filter the reads.  
145 Chimeras were identified de-novo and removed with the UCHIME algorithm [10,11].  
146 Reads were then clustered and assigned to OTUs at a 0.97 identity threshold using  
147 VSEARCH 2.3.4 [12]. Mothur 1.39.5 was run to assign taxonomy according to the  
148 GreenGenes\_13\_8 16S database, allowing the determination of abundance at near-  
149 species resolution in each sample [13,14]. PyNAST 1.2.2 and FastTree were employed  
150 to align OTUs and build a tree used to infer phylogenetic distance [15,16]. Shannon-  
151 Wiener and Gini-Simpson ecological diversity indices and UniFrac distance metrics  
152 were calculated using QIIME 1.9.1 [17]. To reduce biases arising from varying  
153 sequencing depth, samples with less than 2,000 reads were discarded (n=6), and the  
154 remaining samples (n=62) were normalized by rarefying to 2,000 sequences [18].  
155 Rarefaction curves and jackknife estimates were generated to validate the 2,000 read  
156 threshold (S2 File) [17]. Samples were binned into one of six groups representing the

157 diet arm (Regular or Soylent) and study phase (A, B, or C). Since it has been shown  
158 that stomach contents take about a day to fully reach and pass the intestinal tract,  
159 samples are categorized by the dietary phase 24 hours prior to collection [6].

## 160 **Taxonomic analysis**

161 Intra-sample diversity ( $\alpha$ -diversity) was measured using the Shannon-Wiener (H) and  
162 Gini-Simpson (D) diversity indices [17]. Calculated  $\alpha$ -diversity metrics were averaged  
163 within one of six bins representing diet-group and phase of study (e.g. Soylent A). For  
164 each individual, the relative abundances of four dominant phyla (*Actinobacteria*,  
165 *Bacteroidetes*, *Firmicutes*, and *Proteobacteria*) were normalized by subtracting the  
166 baseline community as established in phase A. These values were then binned and  
167 averaged in the same manner as the aforementioned  $\alpha$ -diversity metrics.

168 Distributions within bins containing at least eight samples (Soylent A, Soylent B,  
169 Regular A, and Regular B) were tested for normality using the D'Agostino-Pearson  
170 omnibus test. For  $\alpha$ -diversity metrics, the Regular A, Soylent A, and Soylent B bins were  
171 accepted to follow normal distributions ( $p > 0.05$ ), while the Regular B bin was not ( $p <$   
172  $0.05$ ). For changes in the relative abundance of *Bacteroidetes*, *Firmicutes*, and  
173 *Proteobacteria*, the Regular A, Regular B, Soylent A, and Soylent B bins were accepted  
174 to follow normal distributions ( $p > 0.05$ ). For changes in the relative abundance of  
175 *Actinobacteria*, the Soylent A and Soylent B bins were accepted to follow normal  
176 distributions ( $p > 0.05$ ), while the Regular A and Regular B bins were not ( $p < 0.05$ ).



177 Differences between these bins were statistically analyzed using two-tailed t-tests, and  
178  $p$ -values less than 0.05 were considered to be statistically significant.

179

## 180 **Results**

### 181 **Selected cohort**

182 Study recruitment and follow-ups began on October 20, 2016 and ended on December  
183 2, 2016. Informed Consent was received from 29 individuals, and screening forms were  
184 subsequently collected to determine which individuals were eligible for participation.  
185 Fourteen participants were randomized into either the regular diet or Soylent diet group  
186 with a 5:9 allocation ratio using the 'random.permutation' function of the NumPy  
187 package for Python 2.7 (Fig 1). The sample size was determined to maximize use of  
188 study funding.

189 The 14 participants were all active University of California, Berkeley undergraduates  
190 aged 18-21. The regular diet group consisted of 2 females and 3 males, while the  
191 Soylent diet group consisted of 3 females and 6 males. Participants were of Asian,  
192 European, Hispanic, and Native American descent. Three participants identified as  
193 vegetarians, while the rest consumed vegetables and meat on a regular basis (Table 1).

194 **Table 1. Baseline sociodemographic and dietary profiles of the participants.**

## 195 **Quality of collected samples**

196 One individual in the Soylent diet group consumed less Soylent than instructed, and  
197 therefore their data was not included in the analysis. Eight of the remaining 104 fecal  
198 samples were not collected due to a lack of bowel movements. Of the submitted  
199 samples, 71.9% returned sequencing data from uBiome Inc., with the 1st, 2nd, and 3rd  
200 quartiles of sequencing depths at 8335, 83777, and 208145 reads, respectively (S1  
201 Table, S2 Fig). Although we also collected Bristol stool ratings from each participant, the  
202 data were inconsistent and did not warrant formal analysis.

## 203 **$\alpha$ - and $\beta$ -diversity metrics remain stable during a Soylent diet**

204 Shannon-Wiener and Gini-Simpson  $\alpha$ -diversity indices did not significantly change from  
205 a Soylent dietary intervention (phase A to B) (S3 Fig).

206 Inter-sample diversity ( $\beta$ -diversity) was quantified using unweighted and weighted  
207 UniFrac, which scores distance between samples according to phylogenetic similarity,  
208 in this case using the 16S V4 sequence.  $\beta$ -diversity was visualized using principal-  
209 coordinate analysis (PCoA). Unweighted Unifrac, which only considers the presence or  
210 absence of each OTU, shows that samples strongly cluster by individual. No clustering  
211 of Soylent-treated samples (those taken from participants in the Soylent diet group  
212 during phase B) is observed (Fig 3). Similar clustering patterns are visible using  
213 weighted UniFrac, which scores similarity of samples based on OTU abundance as well  
214 (S4 Fig).

215 **Fig 3. Principle coordinate analysis and visualization of the unweighted UniFrac**  
216 **metric.** A) Unweighted UniFrac, which considers the binary presence or absence of  
217 each OTU, reveals that samples cluster strongly by participant (indicated by color) and  
218 not by diet (denoted by •'s or ×'s). B) Agglomerative clustering performed on the first ten  
219 principal coordinates validates these clustering patterns.

## 220 **Soylent consumption alters relative abundance of dominant** 221 **phyla**

222 During the Soylent dietary intervention (phase B), the Soylent diet group exhibited a  
223 significant increase in the abundance of *Bacteroidetes* ( $p=0.011$ ), as well as a  
224 statistically insignificant decrease in the abundance of *Firmicutes* ( $p=0.078$ ), compared  
225 to the regular diet group (Fig 4A). Accordingly, the *Bacteroidetes* to *Firmicutes* ratio  
226 increased significantly during the same time period ( $p=0.028$ ) (Fig 4B). No significant  
227 change in *Proteobacteria* abundance was observed (Fig 4A). Since the *Actinobacteria*  
228 bins did not follow normal distributions, no comparison was made for the phylum.

229 **Fig 4. Abundance changes of dominant gut microbiota phyla.** A) Changes in the  
230 normalized relative abundance of four dominant gut microbiota phyla averaged within  
231 each diet-phase group. In comparison with the regular diet group, the Soylent diet group  
232 shows a significant increase in *Bacteroidetes* ( $p=0.011$ ) and an insignificant decrease in  
233 *Firmicutes* ( $p=0.078$ ) abundances during the Soylent dietary intervention (phase B).  
234 There is no significant change in *Proteobacteria* abundance during this phase  
235 ( $p=0.937$ ). Statistical comparison of *Actinobacteria* abundance was not performed

236 because the data was not normally distributed. B) Changes in the *Bacteroidetes* to  
237 *Firmicutes* ratio. During the Soylent diet intervention (phase B), there is a significant  
238 increase in the *Bacteroidetes* to *Firmicutes* ratio ( $p=0.028$ ). Standard error is shown.

## 239 Discussion

240 Based on calculated Shannon-Wiener and Gini-Simpson diversity scores, we find no  
241 significant change in  $\alpha$ -diversity across either diet arm, which suggests that overall  
242 microbiome diversity is resilient to dietary changes in the short term. Since Soylent is  
243 very nutrient-rich, it likely does not starve a large enough fraction of gut microbiota to  
244 significantly reduce  $\alpha$ -diversity. This finding could also be by the ability of gut microbes  
245 to remain dormant during the Soylent dietary intervention. Microbiome diversity is of  
246 clinical significance and is negatively associated with diseases such as recurrent  
247 *Clostridium difficile* infection [19]. We find that the interventional Soylent diet does not  
248 negatively impact gut microbiota diversity.

249 Unweighted UniFrac reveals that samples cluster strongly within an individual.  
250 Furthermore, samples from Soylent diet days among different participants do not cluster  
251 together, but rather cluster strongly with each individual's other samples. Visualization  
252 of weighted UniFrac, which scores sample similarity based on OTU abundance as well,  
253 exhibits similar clustering patterns. The clustering patterns described are less apparent,  
254 possibly due to the steep rarefaction that was performed to normalize sample read  
255 depth. This suggests that Soylent does not significantly change which organisms are

256 present in the microbiome, which can be partially explained by the fact that Soylent is  
257 pasteurized and therefore cannot act as a probiotic.

258 We find that Soylent consumption significantly increases the *Bacteroidetes* to *Firmicutes*  
259 ratio in the gut microbiota. Since the *Bacteroidetes* and *Firmicutes* together compose  
260 over 90% of the sampled microbiomes, their abundances are expected to be inversely  
261 correlated. An increase in this ratio is observed in phase B of the Soylent diet arm  
262 compared to the regular diet arm, followed by a rapid return to baseline levels in phase  
263 C. Previous studies have demonstrated associations between the relative abundance of  
264 the phyla *Bacteroidetes* and *Firmicutes* and specific health outcomes. In particular, it  
265 has been shown that a low *Bacteroidetes* to *Firmicutes* ratio is associated with obesity  
266 in mice and humans [20,21]. Additionally, a low ratio is associated with ulcerative colitis  
267 and Crohn's disease, which are types of inflammatory bowel disease [22]. Although  
268 these associations have been strongly demonstrated, causality has not yet been  
269 established in either case.

270 Although the participant pool is relatively small, similar sample sizes have articulated  
271 clear results in other diet-related gut microbiome studies [6]. Nevertheless, missing data  
272 for some samples presents a clear limitation to the study. We were unable to  
273 troubleshoot these samples because sequencing was outsourced to uBiome Inc.  
274 Additionally, the number of reads per sample was highly variable. Therefore, we had to  
275 rarefy our samples to perform meaningful statistical analyses. Although we discarded  
276 many reads from high-depth samples, rarefying has been shown to effectively mitigate  
277 biases associated with sequencing depth variation [18].

278 Although the limitations of 16S surveys are well understood (particularly the lack of  
279 access to functional information), the accuracy of metagenome reconstruction is still  
280 under debate and conclusions drawn from this method should be met with skepticism.  
281 To confidently address these limitations, further studies involving transcriptomics and  
282 metagenomics must be conducted to more accurately identify changes in gene  
283 expression, gene function, and abundance resulting from a Soylent 2.0 dietary  
284 intervention.

285 We conclude that a short-term interventional Soylent diet does not negatively impact the  
286 composition of gut flora communities. As additional studies demonstrate the effect that  
287 specific microbial consortia have on health, both food product manufacturers and  
288 consumers should consider the gut microbiome as an essential component of human  
289 health.

## 290 **Data Availability**

291 Raw sequencing reads in FASTQ format from this study were uploaded to EBI's  
292 European Nucleotide Archive under the accession code PRJEB21752  
293 (<http://www.ebi.ac.uk/ena/data/view/PRJEB21752>).

## 294 Acknowledgements

295 We greatly appreciate the 84 backers of our Experiment crowdfunding campaign for  
296 making this study possible. We thank Gwyneth Terry for assisting with the  
297 administrative coordination of the project, as well as Shyam Bhakta and Michael  
298 Shapira for helpful discussions. We also thank uBiome Inc. for their partnership in  
299 performing sample processing and DNA sequencing.

## 300 References

- 301 1. Turnbaugh PJ, Ley RE, Mahowald MA, Magrini V, Mardis ER, Gordon JI. An  
302 obesity-associated gut microbiome with increased capacity for energy harvest.  
303 Nature. 2006;444: 1027–1031.
- 304 2. Halfvarson J, Brislawn CJ, Lamendella R, Vázquez-Baeza Y, Walters WA, Bramer  
305 LM, et al. Dynamics of the human gut microbiome in inflammatory bowel disease.  
306 Nat Microbiol. 2017;2: 17004.
- 307 3. Brandt LJ, Aroniadis OC, Mellow M, Kanatzar A, Kelly C, Park T, et al. Long-term  
308 follow-up of colonoscopic fecal microbiota transplant for recurrent *Clostridium*  
309 *difficile* infection. Am J Gastroenterol. 2012;107: 1079–1087.
- 310 4. Zhernakova A, Kurilshikov A, Bonder MJ, Tigchelaar EF, Schirmer M, Vatanen T, et  
311 al. Population-based metagenomics analysis reveals markers for gut microbiome

- 312 composition and diversity. *Science*. 2016;352: 565–569.
- 313 5. Smits SA, Marcobal A, Higginbottom S, Sonnenburg JL, Kashyap PC.  
314 Individualized Responses of Gut Microbiota to Dietary Intervention Modeled in  
315 Humanized Mice. *mSystems*. 2016;1. doi:10.1128/mSystems.00098-16
- 316 6. David LA, Maurice CF, Carmody RN, Gootenberg DB, Button JE, Wolfe BE, et al.  
317 Diet rapidly and reproducibly alters the human gut microbiome. *Nature*. 2014;505:  
318 559–563.
- 319 7. Rosa Foods I. Soylent — Food, intelligently designed [Internet]. [cited 4 Jun 2017].  
320 Available: <http://soylent.com>
- 321 8. Almonacid DE, Kraal L, Ossandon FJ, Budovskaya YV, Cardenas JP, Bik EM, et al.  
322 16S rRNA gene sequencing and healthy reference ranges for 28 clinically relevant  
323 microbial taxa from the human gut microbiome. *PLoS One*. 2017;12: e0176555.
- 324 9. ryanusahk/mycrobes\_soylent\_microbiome: Mycrobes Soylent Microbiome DNA  
325 Analysis Pipeline. 2017; doi:10.5281/zenodo.822861
- 326 10. Edgar RC. Search and clustering orders of magnitude faster than BLAST.  
327 *Bioinformatics*. 2010;26: 2460–2461.
- 328 11. Edgar RC, Haas BJ, Clemente JC, Quince C, Knight R. UCHIME improves  
329 sensitivity and speed of chimera detection. *Bioinformatics*. 2011;27: 2194–2200.
- 330 12. Rognes T, Flouri T, Nichols B, Quince C, Mahé F. VSEARCH: a versatile open  
331 source tool for metagenomics. *PeerJ*. 2016;4: e2584.



- 332 13. Schloss PD, Westcott SL, Ryabin T, Hall JR, Hartmann M, Hollister EB, et al.  
333 Introducing mothur: open-source, platform-independent, community-supported  
334 software for describing and comparing microbial communities. *Appl Environ*  
335 *Microbiol.* 2009;75: 7537–7541.
- 336 14. McDonald D, Price MN, Goodrich J, Nawrocki EP, DeSantis TZ, Probst A, et al. An  
337 improved Greengenes taxonomy with explicit ranks for ecological and evolutionary  
338 analyses of bacteria and archaea. *ISME J.* 2012;6: 610–618.
- 339 15. Caporaso JG, Bittinger K, Bushman FD, DeSantis TZ, Andersen GL, Knight R.  
340 PyNAST: a flexible tool for aligning sequences to a template alignment.  
341 *Bioinformatics.* 2010;26: 266–267.
- 342 16. Price MN, Dehal PS, Arkin AP. FastTree 2--approximately maximum-likelihood  
343 trees for large alignments. *PLoS One.* 2010;5: e9490.
- 344 17. Caporaso JG, Kuczynski J, Stombaugh J, Bittinger K, Bushman FD, Costello EK, et  
345 al. QIIME allows analysis of high-throughput community sequencing data. *Nat*  
346 *Methods.* 2010;7: 335–336.
- 347 18. Weiss S, Xu ZZ, Peddada S, Amir A, Bittinger K, Gonzalez A, et al. Normalization  
348 and microbial differential abundance strategies depend upon data characteristics.  
349 *Microbiome.* *BioMed Central;* 2017;5: 27.
- 350 19. Antharam VC, Li EC, Ishmael A, Sharma A, Mai V, Rand KH, et al. Intestinal  
351 Dysbiosis and Depletion of Butyrogenic Bacteria in *Clostridium difficile* Infection  
352 and Nosocomial Diarrhea. *J Clin Microbiol.* 2013;51: 2884–2892.

- 353 20. Ley RE, Bäckhed F, Turnbaugh P, Lozupone CA, Knight RD, Gordon JI. Obesity  
354 alters gut microbial ecology. *Proc Natl Acad Sci U S A*. 2005;102: 11070–11075.
- 355 21. Ley RE, Turnbaugh PJ, Klein S, Gordon JI. Microbial ecology: human gut microbes  
356 associated with obesity. *Nature*. 2006;444: 1022–1023.
- 357 22. Zhou Y, Zhi F. Lower Level of Bacteroides in the Gut Microbiota Is Associated with  
358 Inflammatory Bowel Disease: A Meta-Analysis. *Biomed Res Int*. 2016;2016:  
359 5828959.
- 360

## 361 Supporting Information

362 **S1 Fig. Nutrition Facts for the Soylent 2.0 meal replacement drink.** Participants in  
363 the Soylent diet group consumed 5 servings of Soylent per day during phase B of the  
364 study.

365  
366 **S2 Fig. Sequencing depth was variable among samples.** The 1st, 2nd, and 3rd  
367 quartiles of sequencing depths were 8335, 83777, and 208145 reads, respectively.

368  
369 **S3 Fig.  $\alpha$ -diversity remains consistent throughout a Soylent dietary intervention.**  
370 The Soylent dietary intervention did not result in a significant change in  $\alpha$ -diversity  
371 (Soylent A to Soylent B), as shown by the Shannon-Wiener ( $p=0.279$ ) and Gini-Simpson  
372 ( $p=0.999$ ) metrics. Standard error is shown.

373  
374 **S4 Fig. Principle Coordinate Analysis visualization of two Unifrac variants.**  
375 Unweighted UniFrac, which considers the binary presence or absence of each OTU,  
376 reveals that samples cluster strongly by participant (indicated by color) and not by diet  
377 (denoted by •'s or ×'s). Similar but less apparent trends are seen with the Weighted  
378 UniFrac metric, which weights OTUs based on fractional abundance as well.

379  
380 **S1 Table.** The table links participant IDs to diet groups and collected stool samples.  
381 Samples that returned no reads or were discarded due to low sequencing depth are  
382 denoted.

383 **S1 File. Daily Electronic Log Form**

384

385 **S2 File. Validation and discussion of rarifying**

**Enrollment**

Assessed for eligibility (n=29)

Excluded (n=15)

Randomized (n=14)

**Allocation**

Intervention (n=9)

Non-intervention (n=5)

**Follow-Up**

Lost to follow-up (n=0)  
Discontinued intervention (n=1)

Lost to follow-up (n=0)  
Discontinued (n=0)

**Analysis**

Analyzed (n=7)  
**Excluded from analysis**  
No sequencing data (n=1)

Analyzed (n=5)

|                     | Phase A      |   | Phase B      |   |   |   | Phase C      |   |   |    |
|---------------------|--------------|---|--------------|---|---|---|--------------|---|---|----|
| Day                 | 1            | 2 | 3            | 4 | 5 | 6 | 7            | 8 | 9 | 10 |
| Microbiome Sampling | ✓            | ✓ | ✓            | ✓ | ✓ | ✓ | ✓            | ✗ | ✗ | ✓  |
| Soylent Group (n=9) | regular diet |   | Soylent diet |   |   |   | regular diet |   |   |    |
| Control Group (n=5) | regular diet |   | regular diet |   |   |   | regular diet |   |   |    |

**A**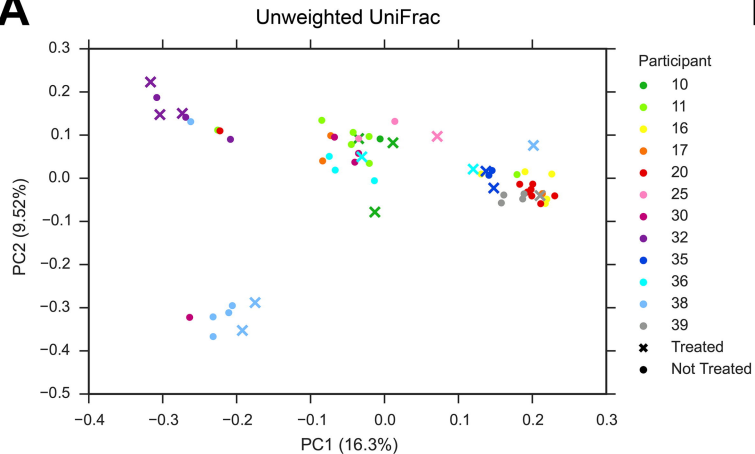**B**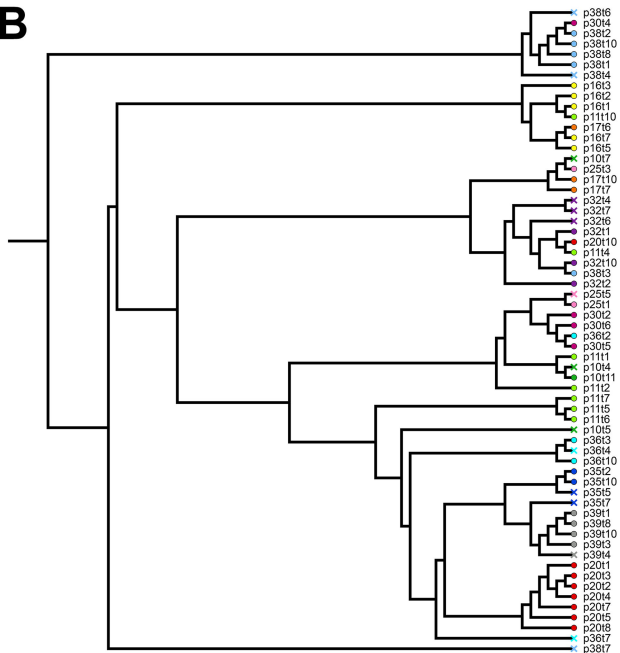

**A**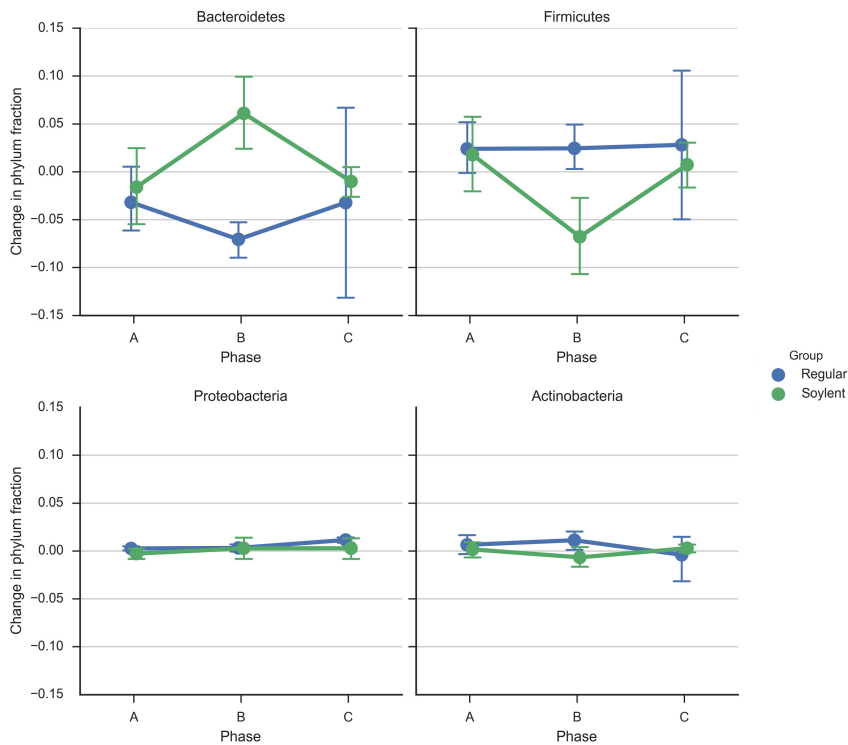**B**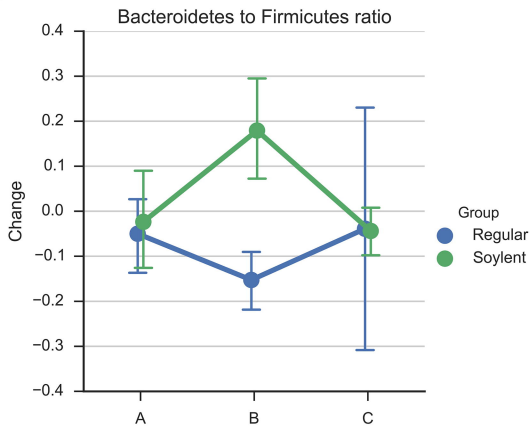

Source: https://www.biorxiv.org/content/10.1101/200881v1.full.pdf
